# Supplementary material
Source: MDPI journal article supplement (https://www.mdpi.com/2076-3417/14/2/552)
Supplement: s1 [file s1]

# Training booklet with pelvic raise

**WEEK no.** \_\_\_\_\_. Do \_\_\_\_\_ repetitions of each exercise and \_\_\_\_\_ sets total.  
Tick the chart below when you do the exercises, to document your training.

| Photos of the exercise                                                              | Description                                        | mon | tue | wed | thu | fri | sat | sun |
|-------------------------------------------------------------------------------------|----------------------------------------------------|-----|-----|-----|-----|-----|-----|-----|
|    | Chair raises                                       |     |     |     |     |     |     |     |
|    | Knee bends                                         |     |     |     |     |     |     |     |
|   | Standing walk                                      |     |     |     |     |     |     |     |
|  | Pelvic raise                                       |     |     |     |     |     |     |     |
|  | Outdoor walk for 15 minutes or as long as possible |     |     |     |     |     |     |     |

## Training booklet with pelvic raise

WEEK no. \_\_\_\_\_.

Note below, other forms of training/activity you may also performs during the week.

Other training/activity can be e.g. exercise bike (or sofa bike), the gym, a supplementary training program at the gym or in your home, swimming, extra walks (in addition to those carried out in connection with the training program), etc.

[illegible]
